# Supplementary material
Source: publisher figshare collection journal article supplement (https://acs.figshare.com/ndownloader/files/3998356)
Supplement: Supplementary file 1 [file 3998356]

## Design and synthesis of curcumin analogues for in vivo fluorescence imaging and inhibiting copper-induced crosslinking of amyloid beta species in Alzheimer's disease

Xueli Zhang<sup>1,2,3</sup>, Yanli Tian<sup>1,4</sup>, Zeng Li<sup>5</sup>, Xiaoyu Tian<sup>6</sup>, Hongbin Sun<sup>2,3</sup>, Hong Liu<sup>5</sup>, Anna Moore<sup>1\*</sup>, and Chongzhao Ran<sup>1\*</sup>

### Supplemental Information

#### SI Figure legends

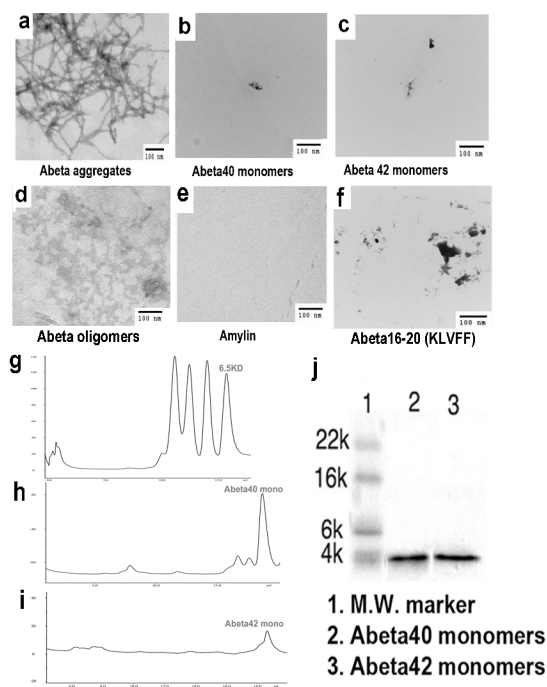

**SI Fig.1** TEM (negative staining with PTA) of Aβ40 aggregates (a), Aβ40 monomers (b), Aβ42 monomers (c), Aβ42 oligomers (d), Amylin (e), and Aβ16-20 (f), scale bar: 100nm. (g-i) Size exclusion chromatography (SEC) of standard protein (g), Aβ40 monomers (h) and Aβ42 monomers (i). (j) SDS-PAGE gel of Aβ40 and Aβ42 monomers.

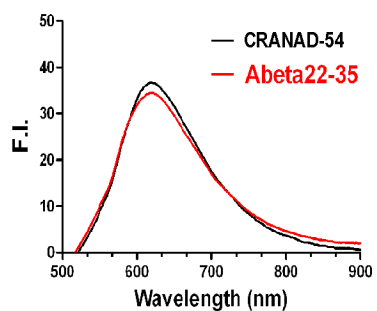

**SI Fig.2** Fluorescence emission spectra of CRANAD-54 alone (black), and with Aβ22-35 (red).

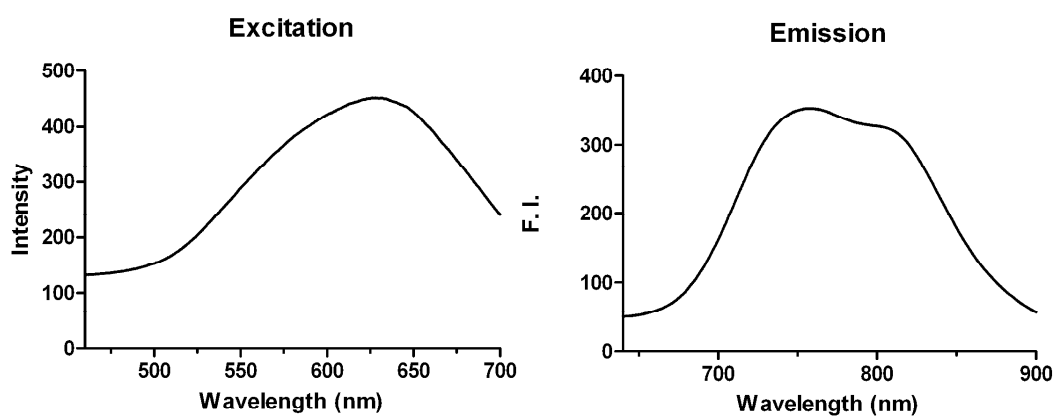

**SI Fig.3** The excitation and emission spectra of CRANAD-58 (2.5 μM in PBS, pH 7.4).

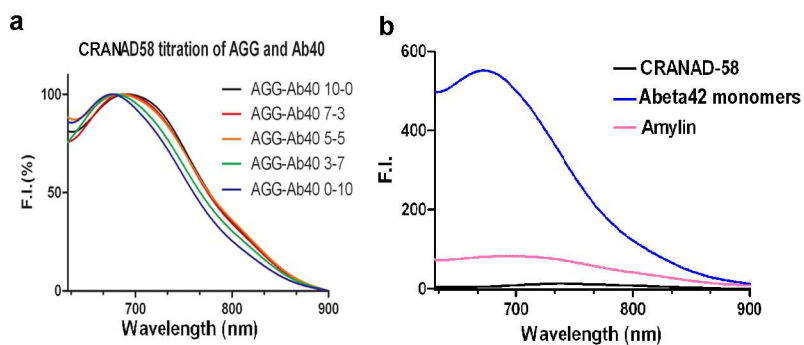

**SI Fig.4** (a) Fluorescence spectra of CRANAD-58 titration with Aβ monomers and aggregates. (b) Fluorescence emission spectra of CRANAD-58 alone (black), with amylin (pink) and Aβ42 monomers (blue).

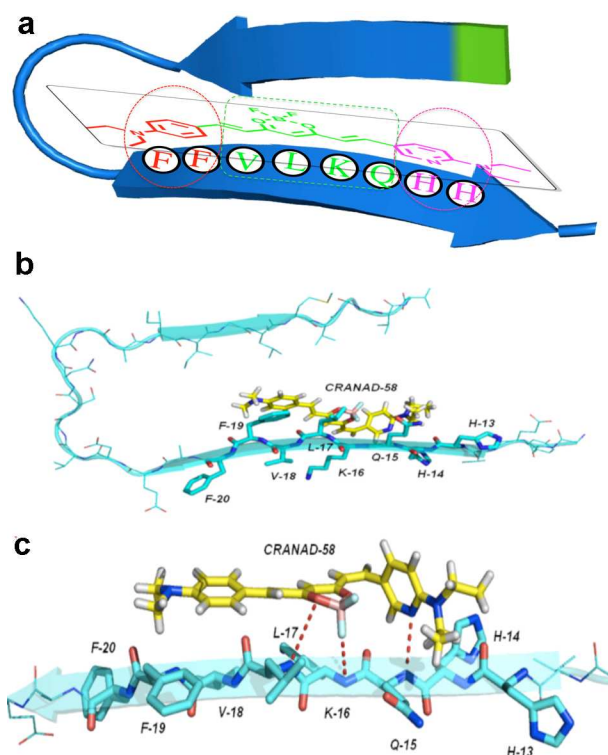

**SI Fig.5** (a) The proposed interaction model of CRANAD-58 with Aβ40/42, in which the three interacting pockets are highlighted with circles or rectangle. (b) Docking results of CRANAD-58 with Aβs, and (c) a zoomed in image of (b).

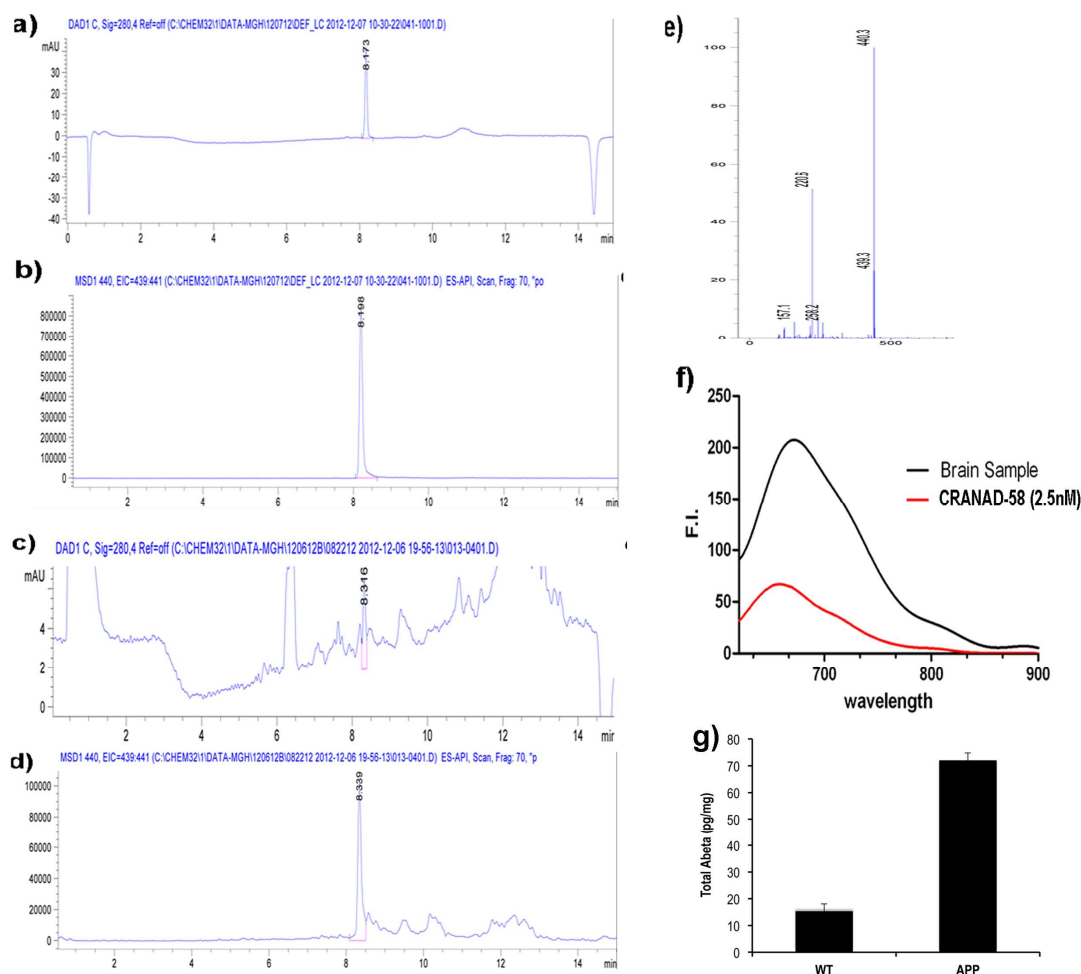

**SI Fig.6** LC-MS and fluorescence spectra measurements of brain extracts (in 80% acetonitrile) 60 min after CRANAD-58 injection. (a) LC spectrum of CRANAD-58 (UV = 280nm); (b) LC-MS of ion extraction with m/z = 439-411 (M.W. of CRANAD-58: 440.3). (c) LC spectrum of CRANAD-58 from the brain extracts (UV = 280nm); (d) LC-MS of ion extraction with m/z = 439-411; the peak corresponds to the M.W. of CRANAD-58. (e) MS spectra of CRANAD-58. (f) Fluorescence spectra of standard CRANAD-58 (red line, in 80% acetonitrile), and brain extractions (black). (g) ELISA of Aβ levels in brain homogenates of APP/PS1 mice and control mice.

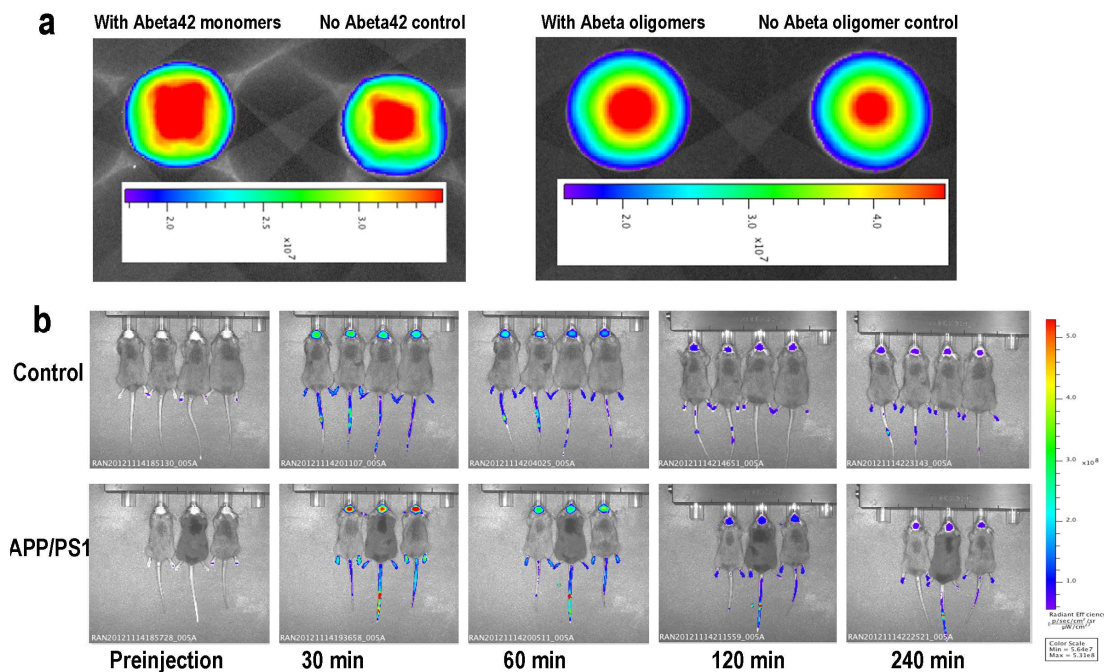

**SI Fig.7** (a) Brain phantom imaging with A $\beta$  monomers (left) and oligomers (right). (b) Images of all mice used for in vivo imaging.

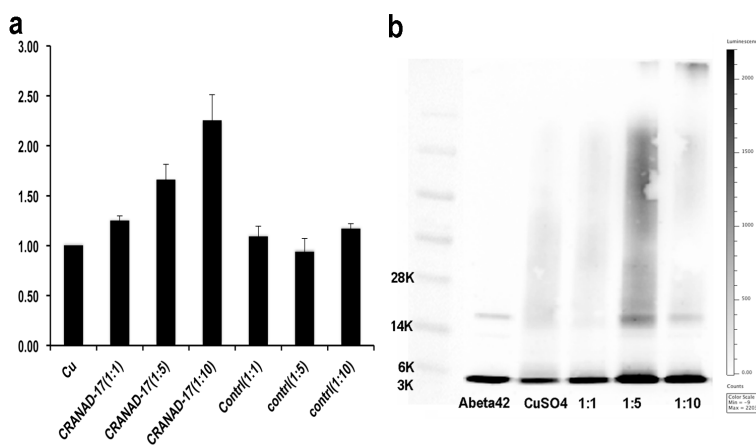

**SI Fig.8** Quantitative analysis of monomeric bands in Fig.8c. (b) Western blot of A $\beta$ 42 (without copper, lane 1), treated with CuSO<sub>4</sub> (lane 2), and CuSO<sub>4</sub> + CRANAD-17 (lanes 3-5) (A $\beta$ 42/CRANAD-17 = 1:1, 1:5, and 1:10).

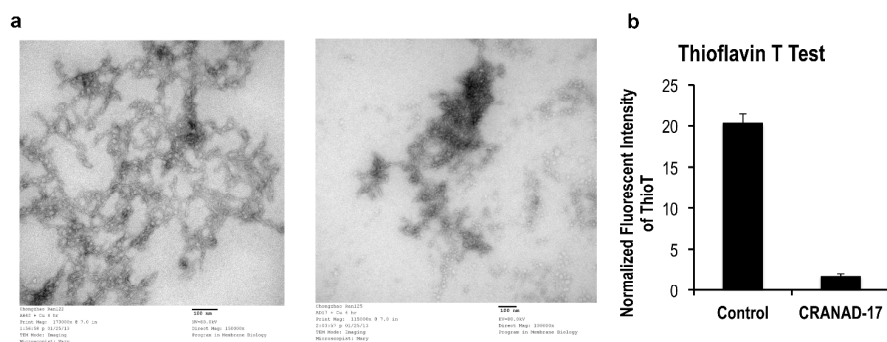

**SI Fig.9** (a) TEM imaging of Aβ<sub>42</sub> treated with CuSO<sub>4</sub> (left), and with CuSO<sub>4</sub>+CRANAD-17 (right). (b) Fluorescence intensity of Thioflavin T obtained from Aβ<sub>42</sub> solutions treated with CuSO<sub>4</sub> and CuSO<sub>4</sub>+CRANAD-17.

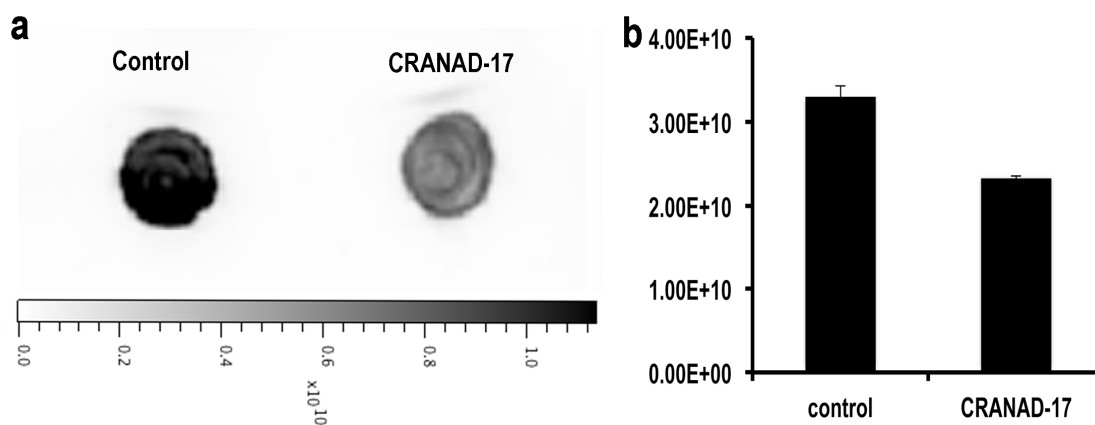

**SI Fig.10** (a) Dot-blotting of Aβ<sub>42</sub> treated with CuSO<sub>4</sub> (left) and with CuSO<sub>4</sub>+CRANAD-17 (right) using Aβ antibody 2H4, which has better recognizing capability for Aβ fibrils. (b) Quantitative analysis of (a) (n=2).
